# Supplementary material for: Nanostructured robust cobalt metal alloy based anode electro-catalysts exhibiting remarkably high performance and durability for proton exchange membrane fuel cells
Source: Royal Society of Chemistry journal article supplement (doi:10.1039/c5ta01362c), 2015-01-01
Supplement: c5ta01362c1.pdf [file c5ta01362c1.pdf]

**Supplementary information for**

**Nanostructured robust cobalt metal alloy based anode electro-catalysts exhibiting  
remarkably high performance and durability for proton exchange membrane fuel cells**

Prasad Prakash Patel<sup>1</sup>, Moni Kanchan Datta<sup>2,3</sup>, Oleg I. Velikhokhatnyi<sup>2,3</sup>, Prashanth Jampani<sup>2</sup>,  
Daeho Hong<sup>2</sup>, James A. Poston<sup>4</sup>, Ayyakkannu Manivannan<sup>4</sup>, Prashant N. Kumta<sup>1,2,3,5,6\*</sup>

<sup>1</sup>Department of Chemical and Petroleum Engineering, Swanson School of Engineering, University of Pittsburgh, Pittsburgh, PA 15261, USA.

<sup>2</sup>Department of Bioengineering, Swanson School of Engineering, University of Pittsburgh, Pittsburgh, PA 15261, USA.

<sup>3</sup>Center for Complex Engineered Multifunctional Materials, University of Pittsburgh, PA 15261, USA.

<sup>4</sup>US Department of Energy, National Energy Technology Laboratory, Morgantown, WV 26507.

<sup>5</sup>Mechanical Engineering and Materials Science, Swanson School of Engineering, University of Pittsburgh, Pittsburgh, PA 15261, USA.

<sup>6</sup>School of Dental Medicine, University of Pittsburgh, PA 15217, USA.

\*Corresponding author: Prashant N. Kumta ([pkumta@pitt.edu](mailto:pkumta@pitt.edu)) Department of Bioengineering, 815C Benedum Hall, 3700 O'Hara Street, Pittsburgh, PA 15261.

Tel: +1-412-648-0223, Fax: +1-412-624-3699

**This is an abstract presented at the 225<sup>th</sup> Electrochemical Society Meeting in Orlando, FL (May 11-15, 2014).**

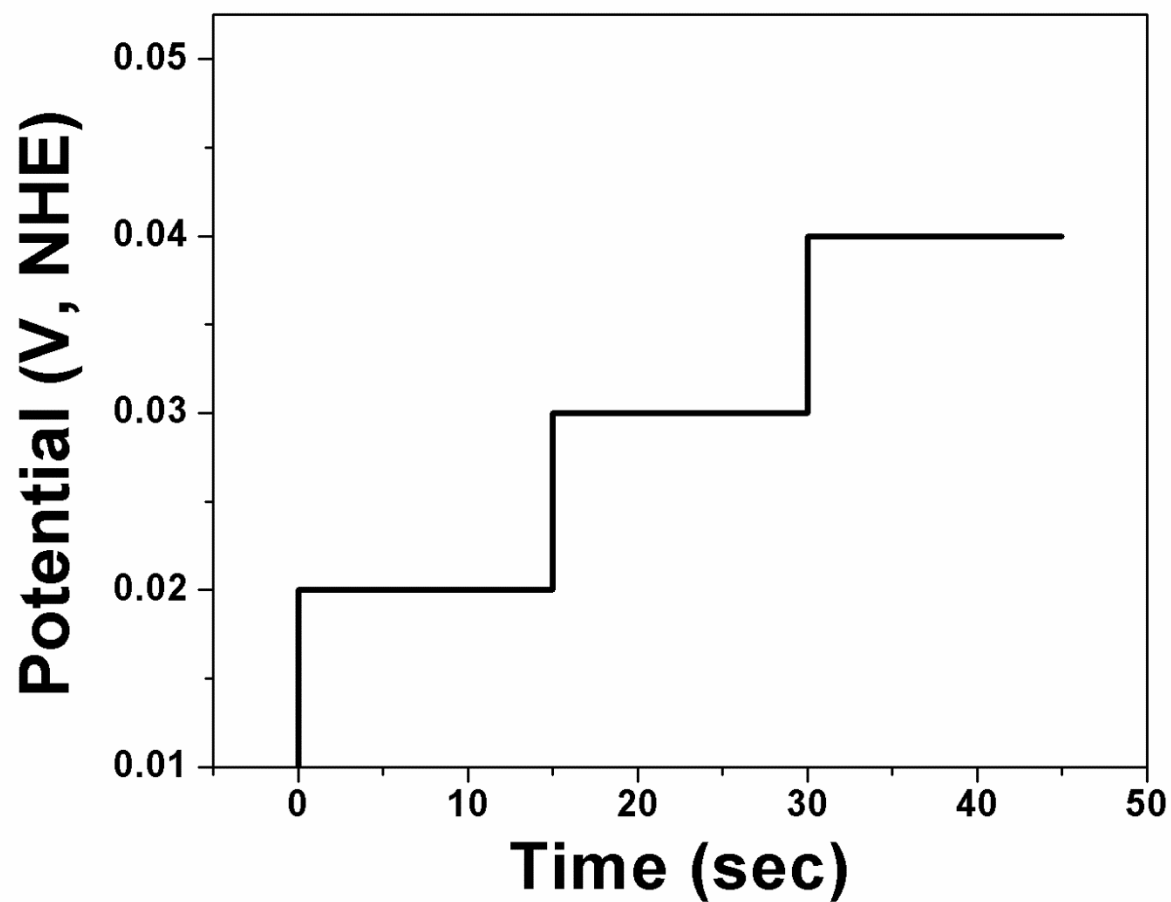

**Figure S1:** Method of multiple small potential steps used on the RDE to reduce the contribution by charging current and current measurement that was performed at the end of each step.

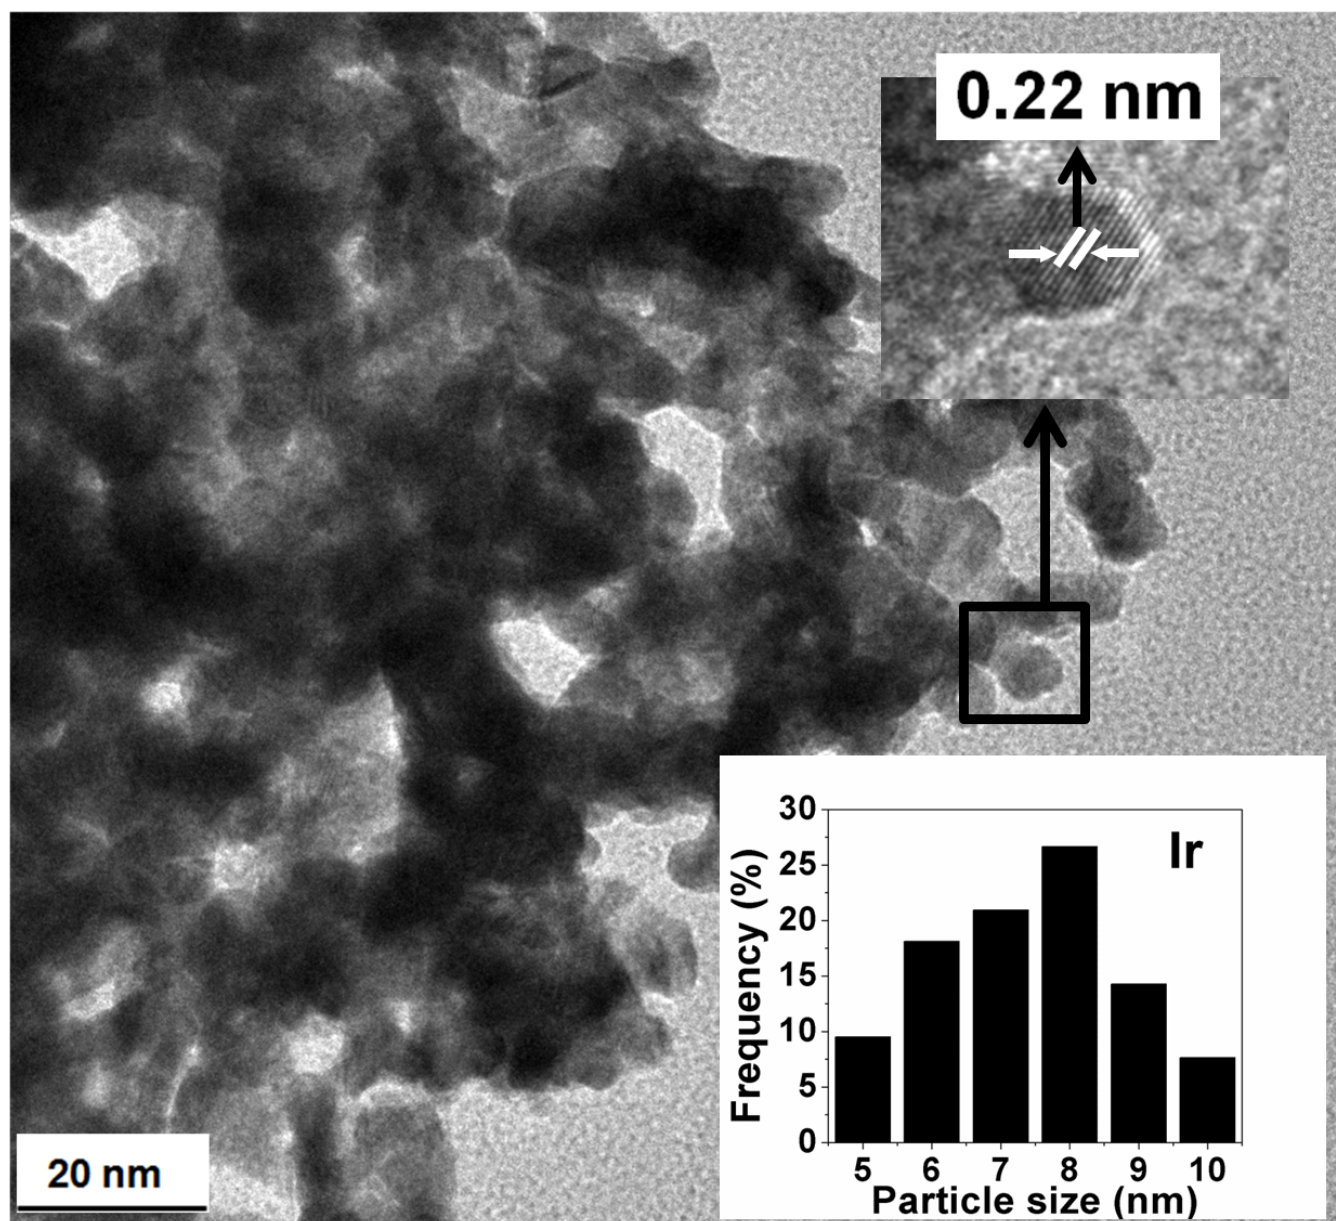

**Figure S2:** The bright field TEM image of Ir NPs showing the presence of fine nanoparticles with HRTEM image showing lattice fringes with a spacing of  $\sim 0.22$  nm.

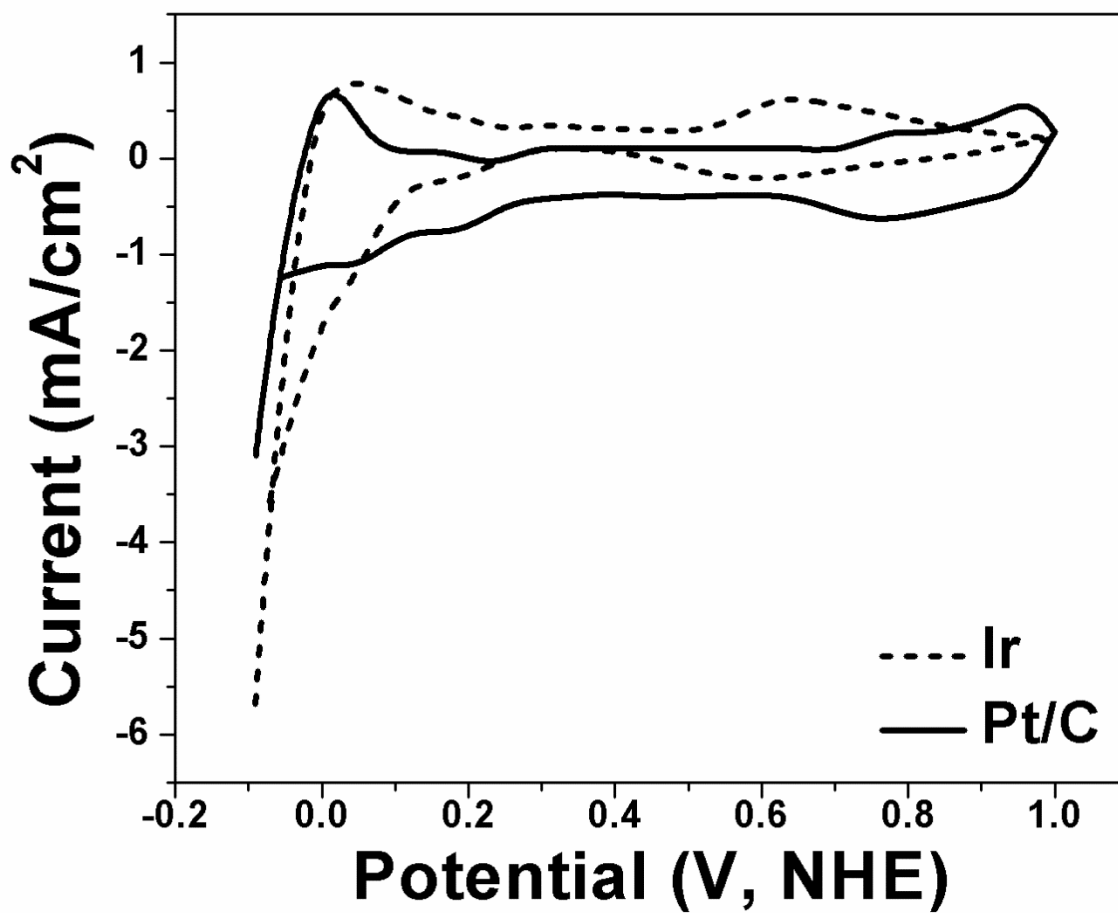

**Figure S3:** The cyclic voltammetry (CV) curve for HOR of Ir-NPs and Pt/C, measured in H<sub>2</sub> saturated 0.5 M H<sub>2</sub>SO<sub>4</sub> electrolyte solution at 40°C at scan rate of 10 mV/sec.



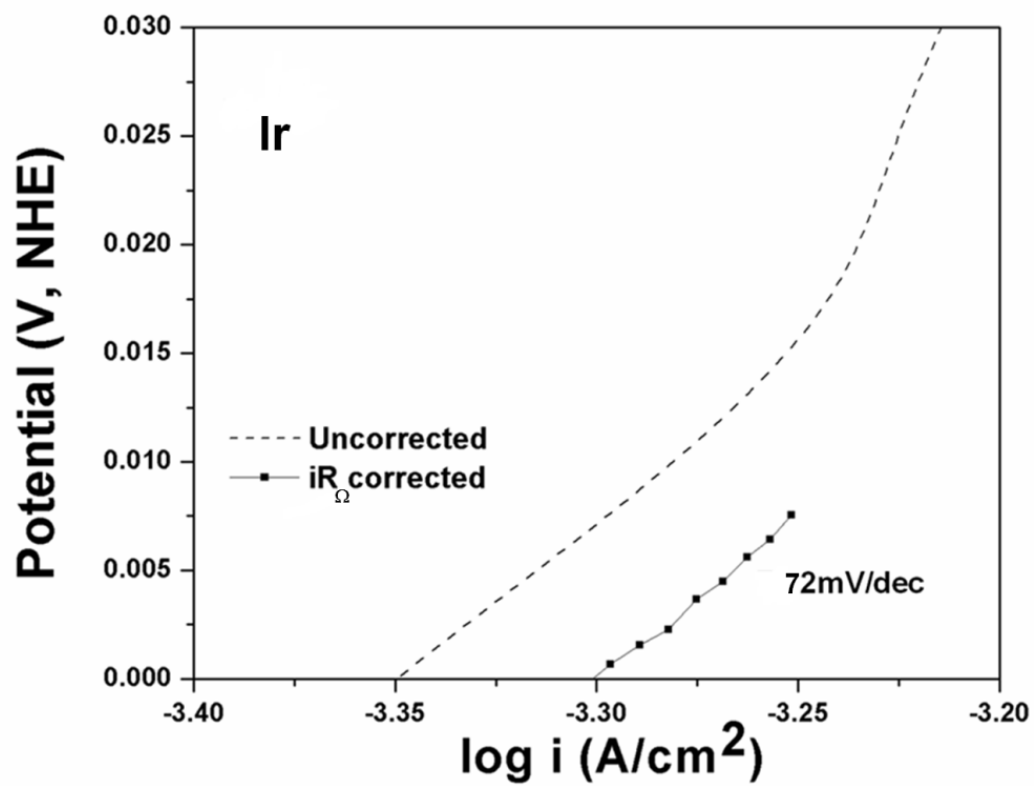

**Figure S4:** Tafel polarization plot of Ir NPs, before and after  $iR_{\Omega}$  correction.

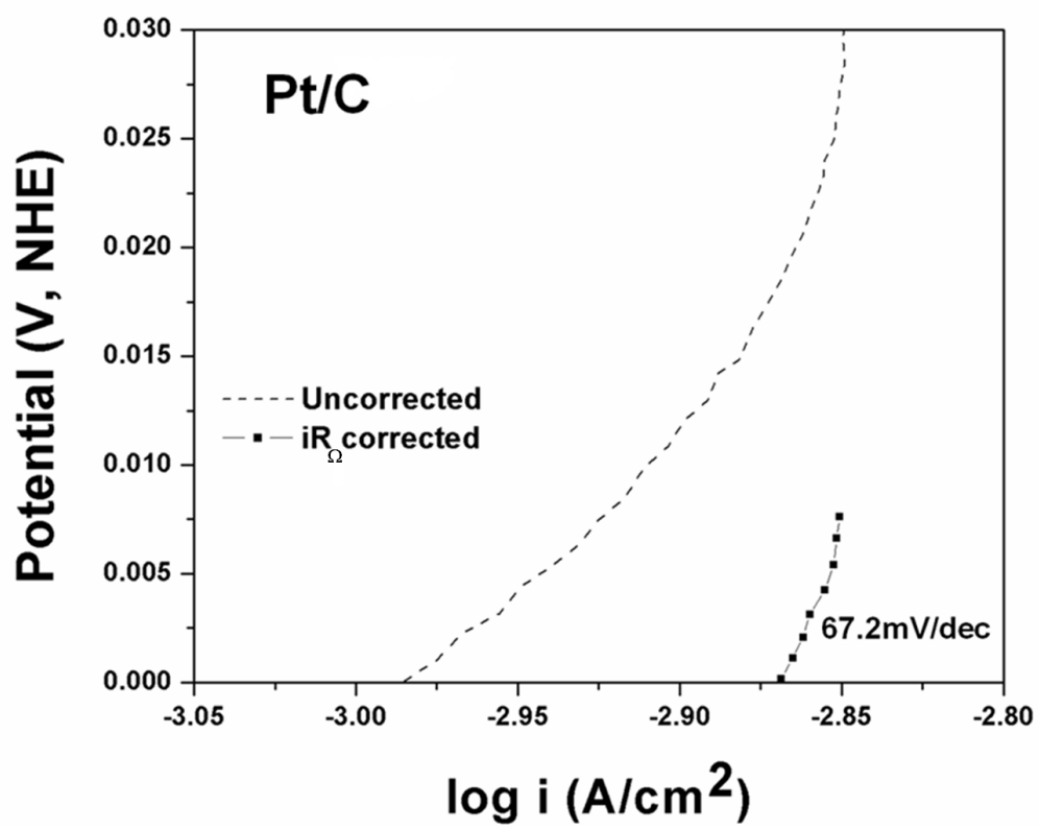

**Figure S5:** Tafel polarization plot of Pt/C, before and after  $iR_{\Omega}$  correction.

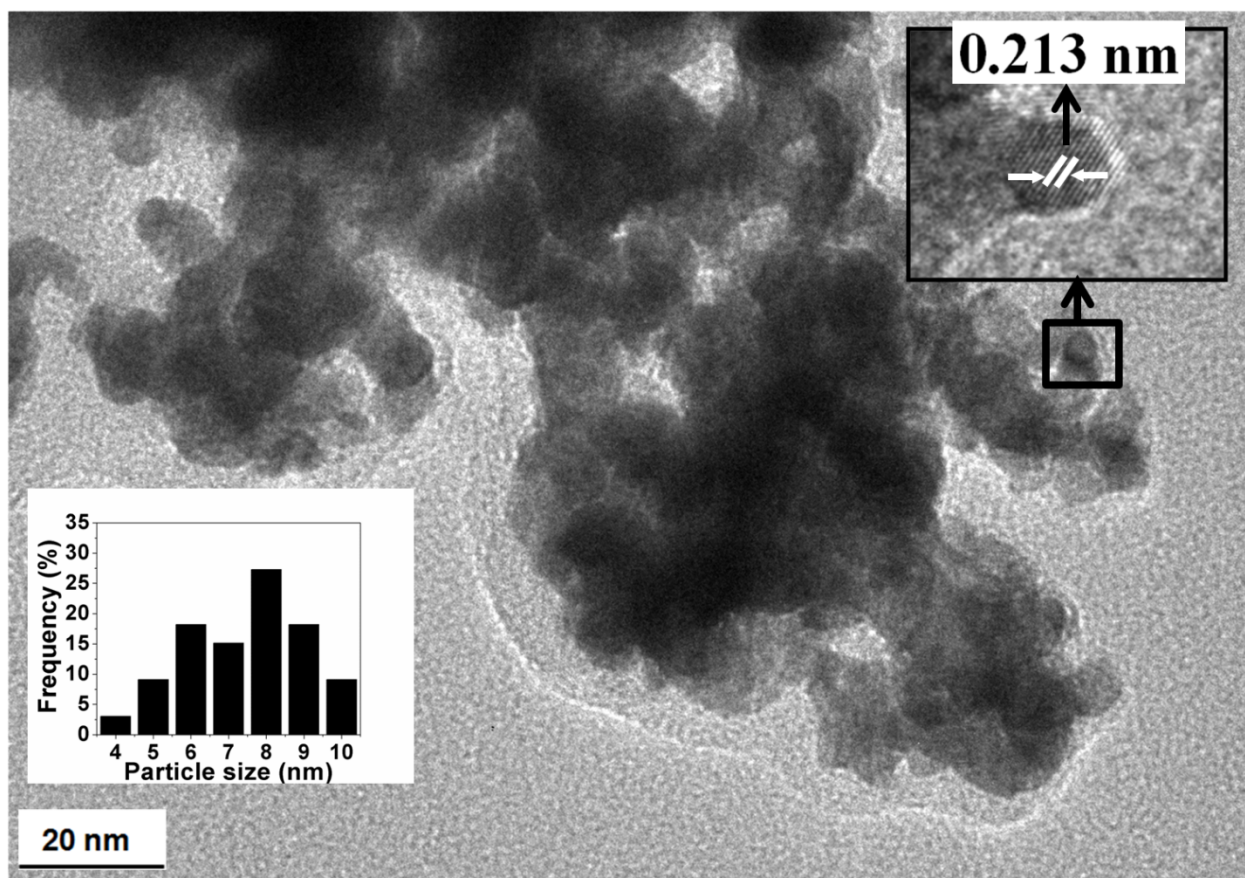

**Figure S6:** The bright field TEM image of  $\text{Co}_{0.7}(\text{Ir}_{0.3})$  showing the presence of fine nanoparticles and the particle size distribution with the HRTEM inset image showing lattice fringes with a spacing of  $\sim 0.213$  nm.

## SEM Micrograph

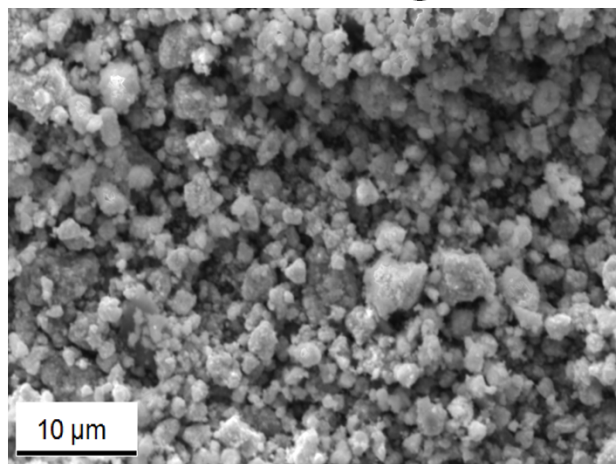

## Co

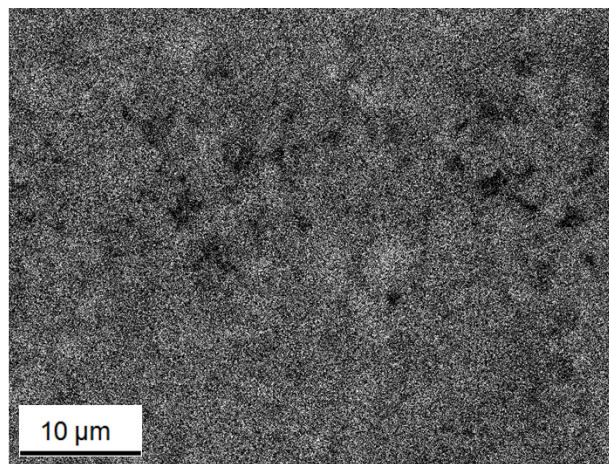

## Ir

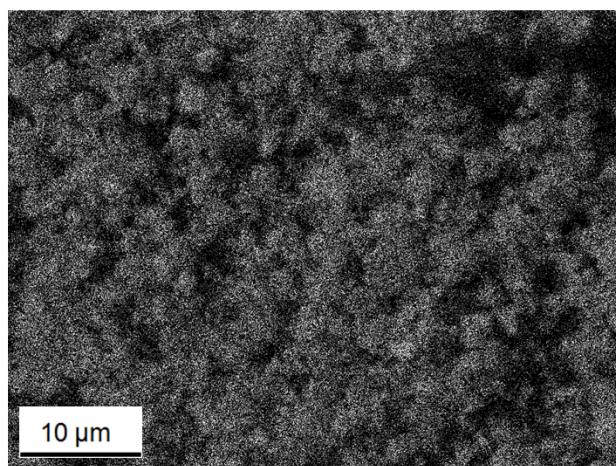

## EDAX spectrum

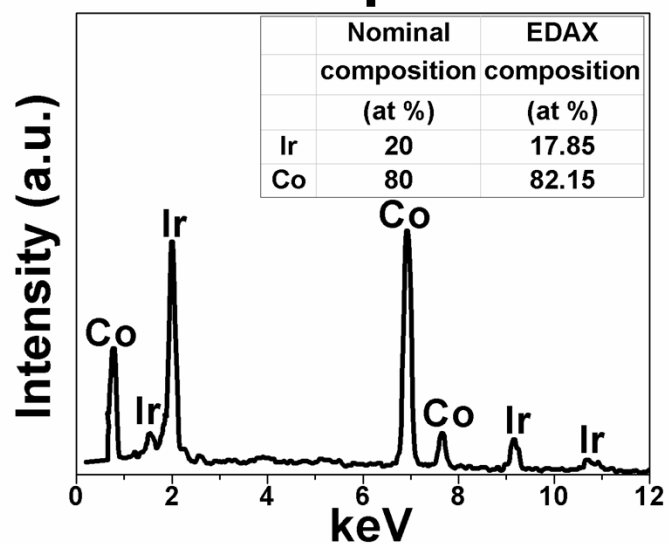

**Figure S7:** SEM micrograph and the corresponding elemental mapping, and EDAX spectrum of  $\text{Co}_{0.8}(\text{Ir}_{0.2})$  collected from the solid solution nanoparticles.



## SEM Micrograph

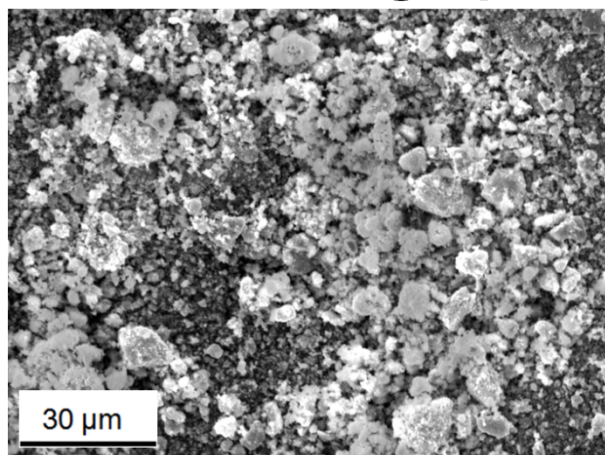

## Co

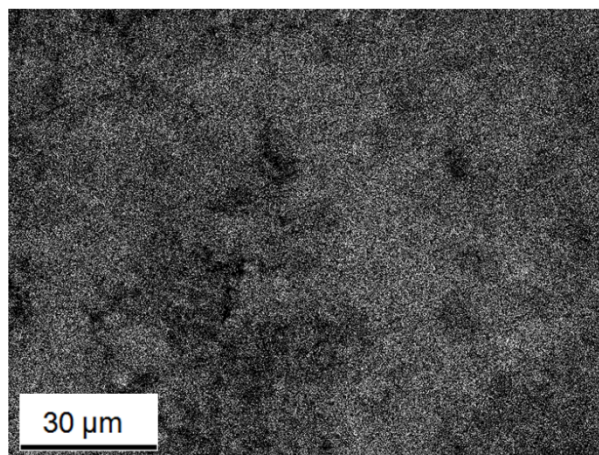

## Ir

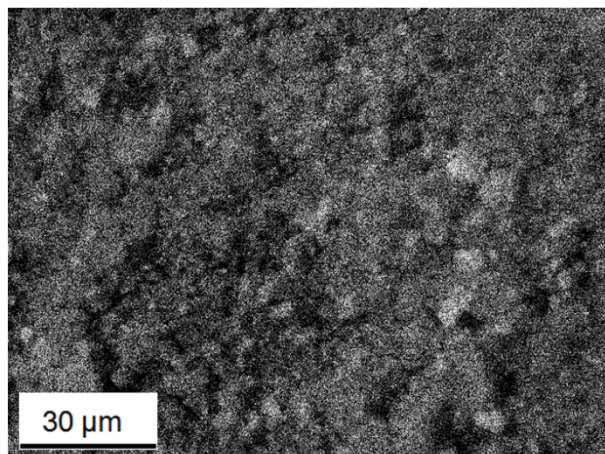

## EDAX spectrum

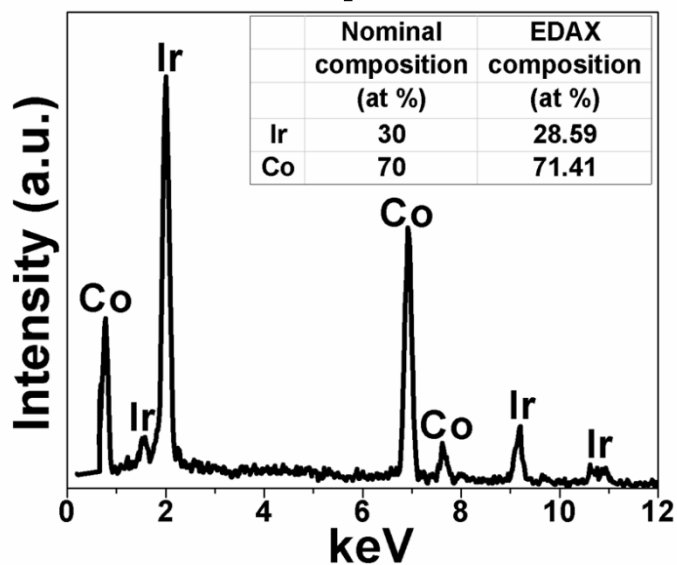

**Figure S8:** SEM micrograph and the corresponding elemental map and EDAX spectrum of  $\text{Co}_{0.7}(\text{Ir}_{0.3})$  collected from the solid solution alloy nanoparticles.

## SEM Micrograph

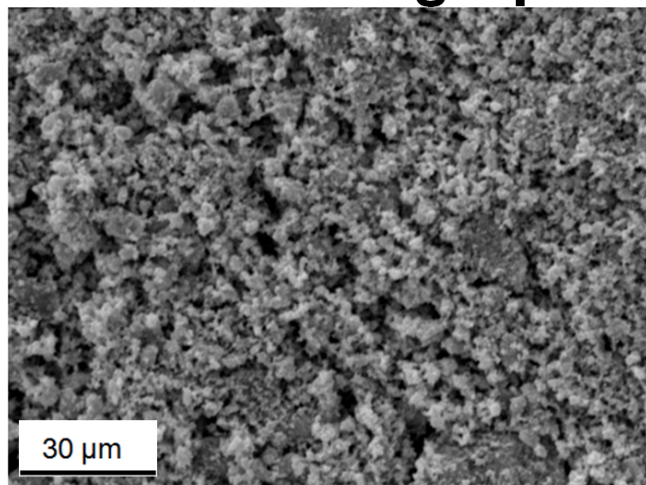

Ir

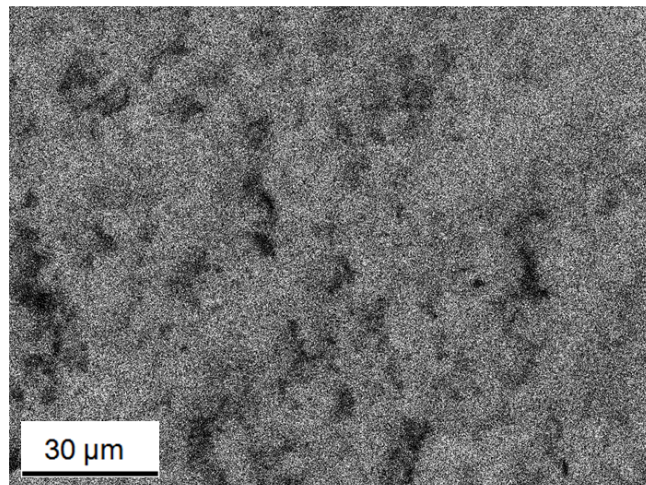

## EDAX spectrum

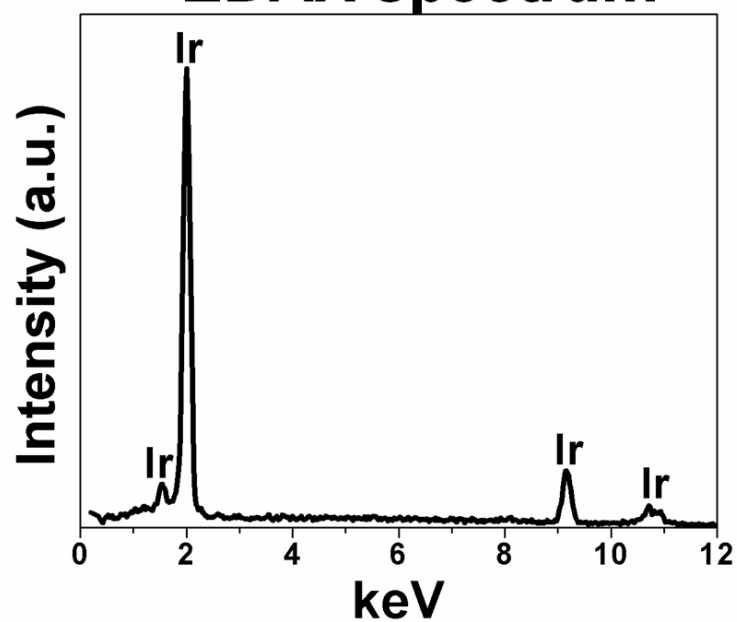

**Figure S9:** SEM micrograph and the corresponding elemental map and EDAX spectrum of Ir collected from the Ir nanoparticles.

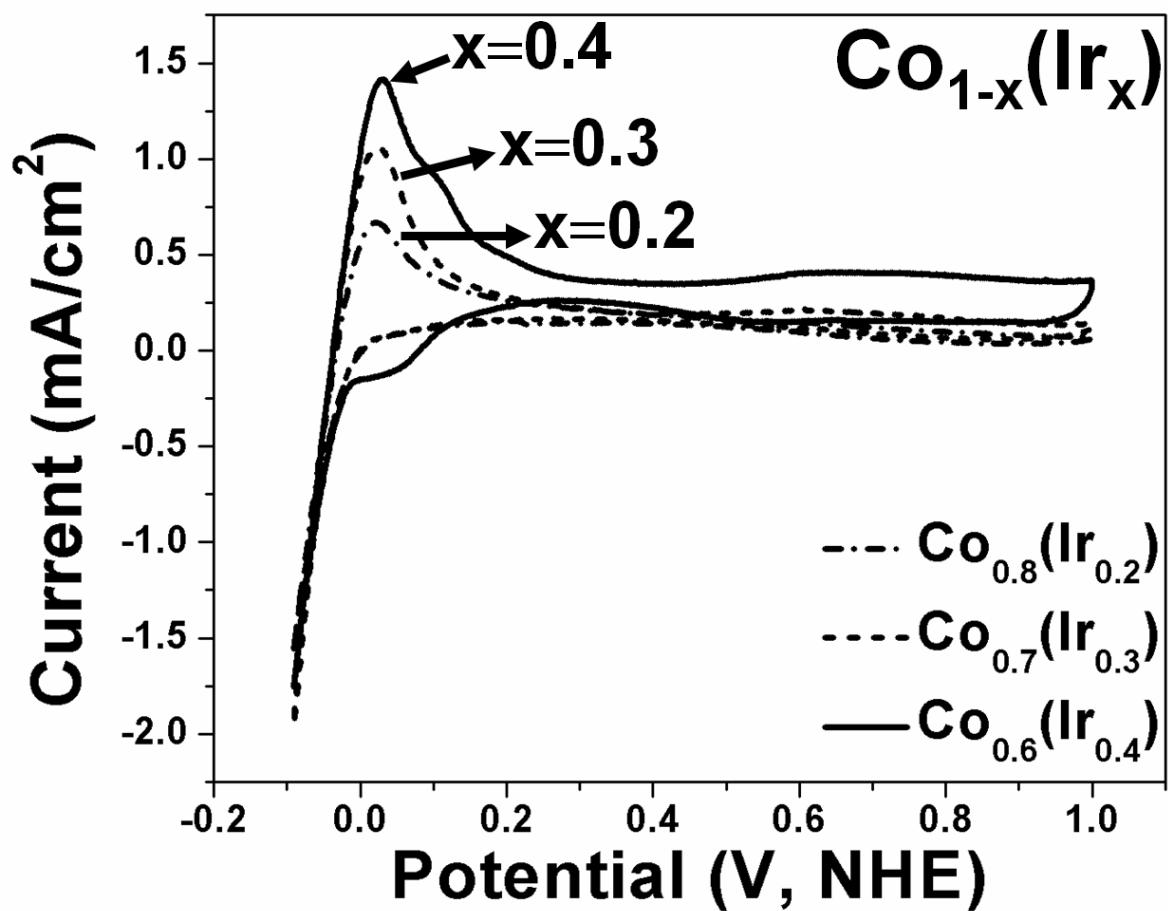

**Figure S10:** The cyclic voltammetry (CV) curve for HOR of  $\text{Co}_{1-x}(\text{Ir}_x)$  ( $x=0.2, 0.3, 0.4$ ), measured in  $\text{H}_2$  saturated 0.5 M  $\text{H}_2\text{SO}_4$  electrolyte solution at 40°C at scan rate of 10 mV/sec

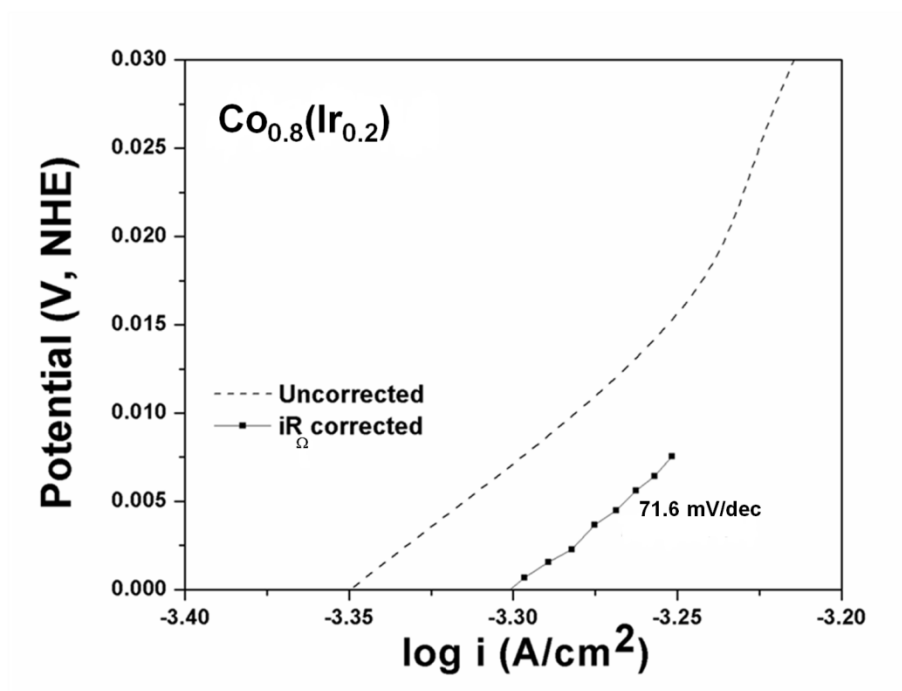

**Figure S11:** Tafel polarization plot of  $\text{Co}_{0.8}(\text{Ir}_{0.2})$ , before and after  $iR_{\Omega}$  correction.

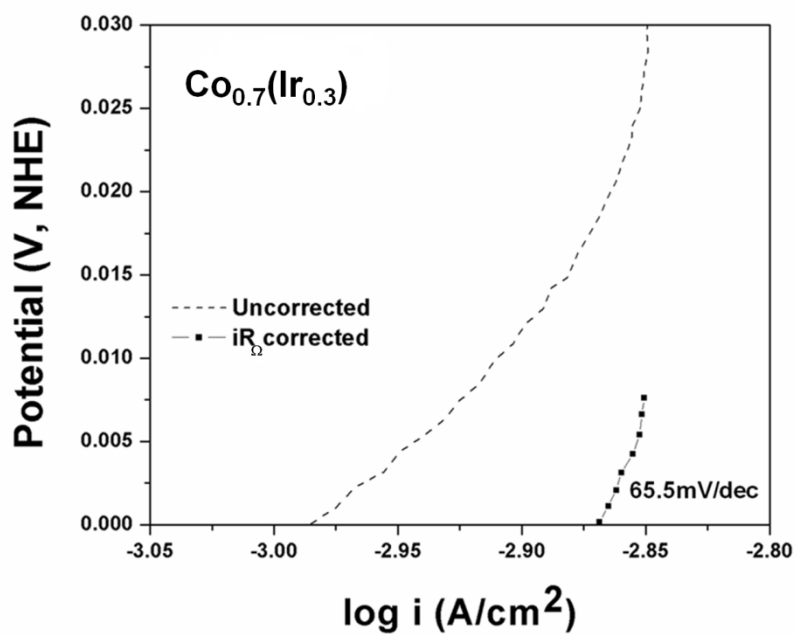

**Figure S12:** Tafel polarization plot of  $\text{Co}_{0.7}(\text{Ir}_{0.3})$ , before and after  $iR_{\Omega}$  correction.



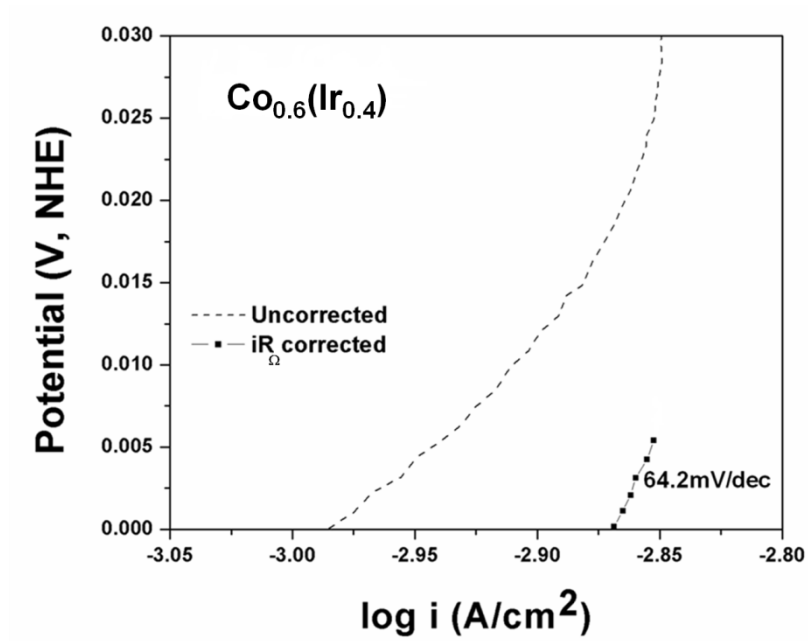

**Figure S13:** Tafel polarization plot of  $\text{Co}_{0.6}\text{Ir}_{0.4}$ , before and after  $iR_{\Omega}$  correction.

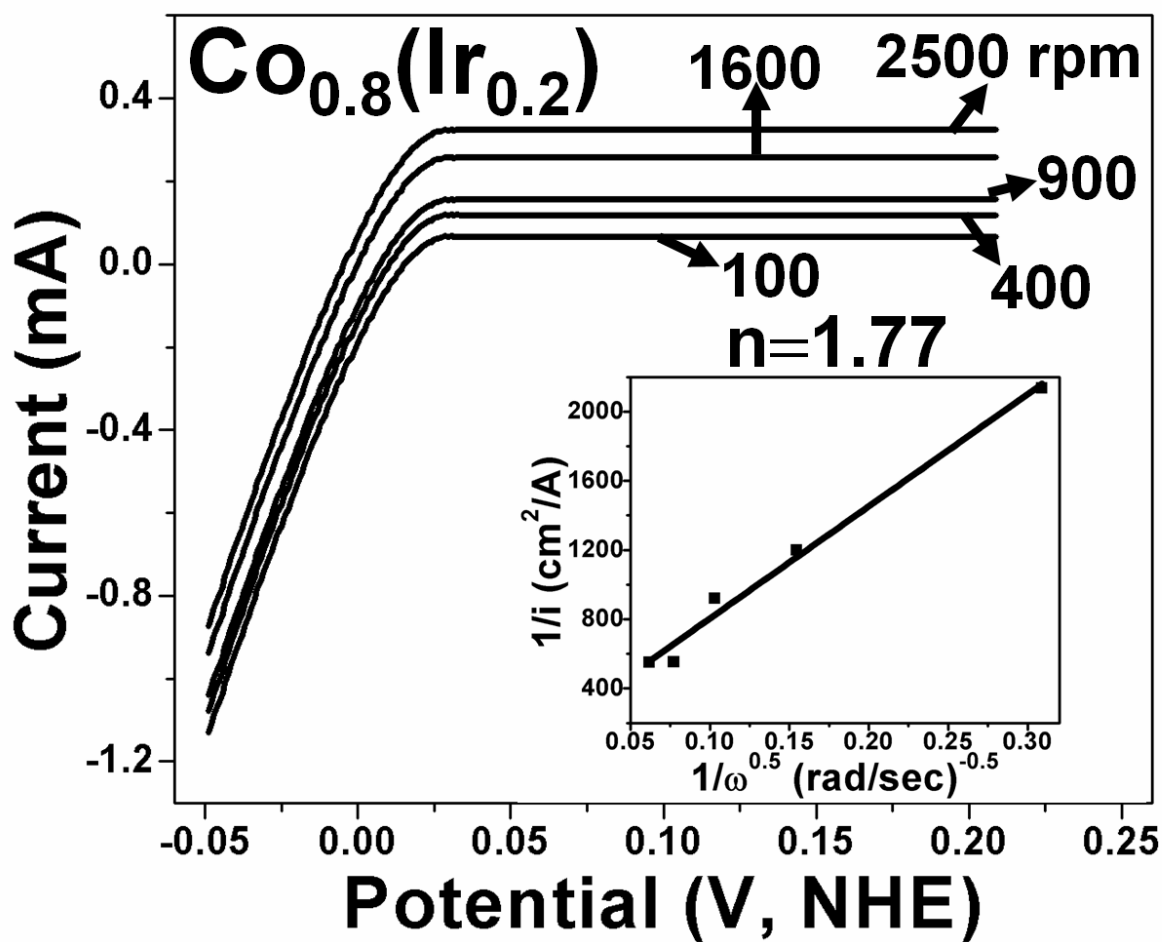

**Figure S14:** The polarization curve for HOR of  $\text{Co}_{0.8}\text{Ir}_{0.2}$  obtained on rotating disk electrode (RDE), measured in  $\text{H}_2$  saturated 0.5 M  $\text{H}_2\text{SO}_4$  electrolyte solution at 40°C with a scan rate of 10 mV/sec. Koutechy-Levich plot obtained for  $\text{Co}_{0.8}\text{Ir}_{0.2}$  is shown in the inset of the polarization curve.

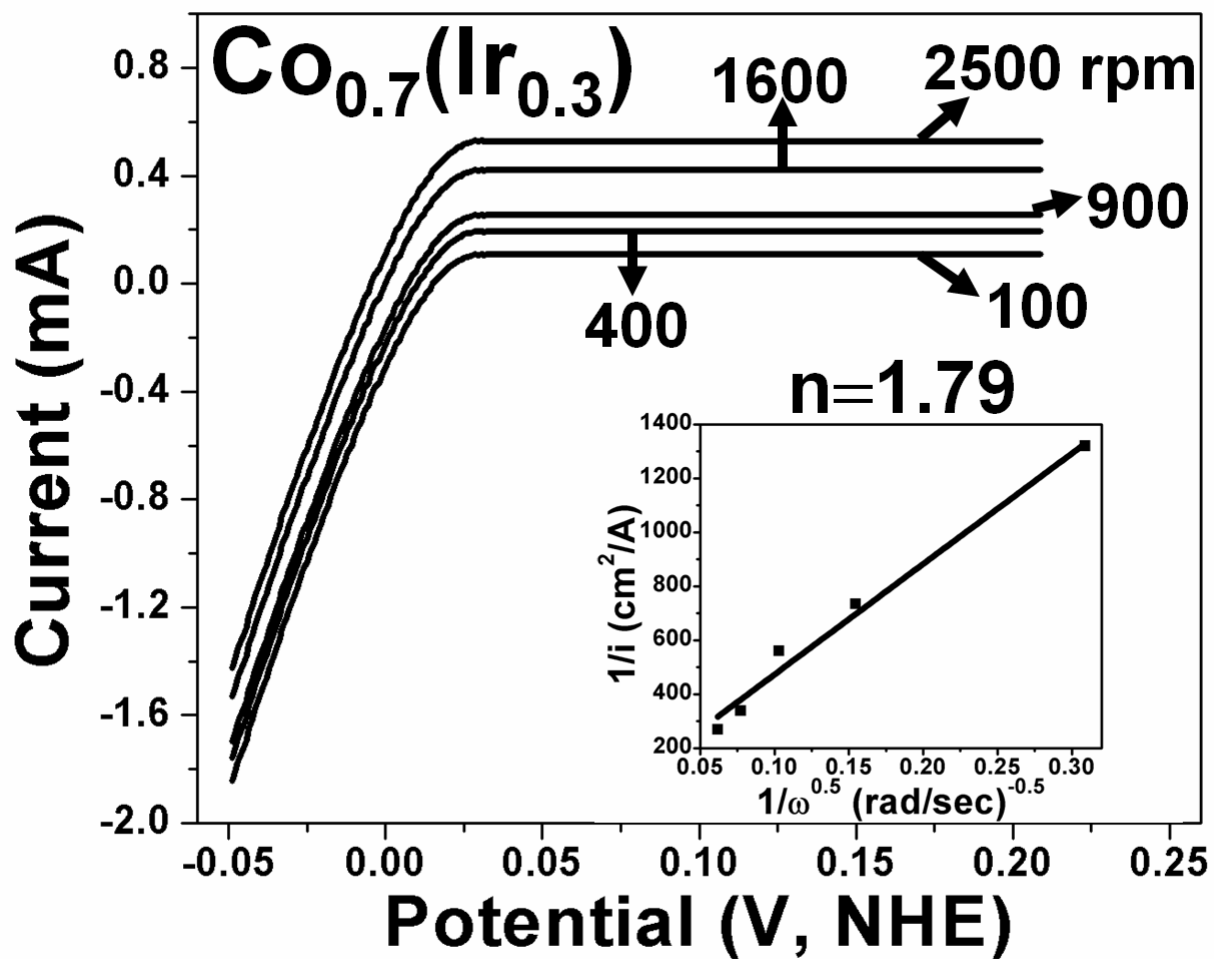

**Figure S15:** The polarization curve for HOR of  $\text{Co}_{0.7}(\text{Ir}_{0.3})$  obtained on rotating disk electrode (RDE), measured in  $\text{H}_2$  saturated 0.5 M  $\text{H}_2\text{SO}_4$  electrolyte solution at  $40^\circ\text{C}$  with a scan rate of 10 mV/sec. Koutechy-Levich plot obtained for  $\text{Co}_{0.7}(\text{Ir}_{0.3})$  is shown in the inset of the polarization curve.

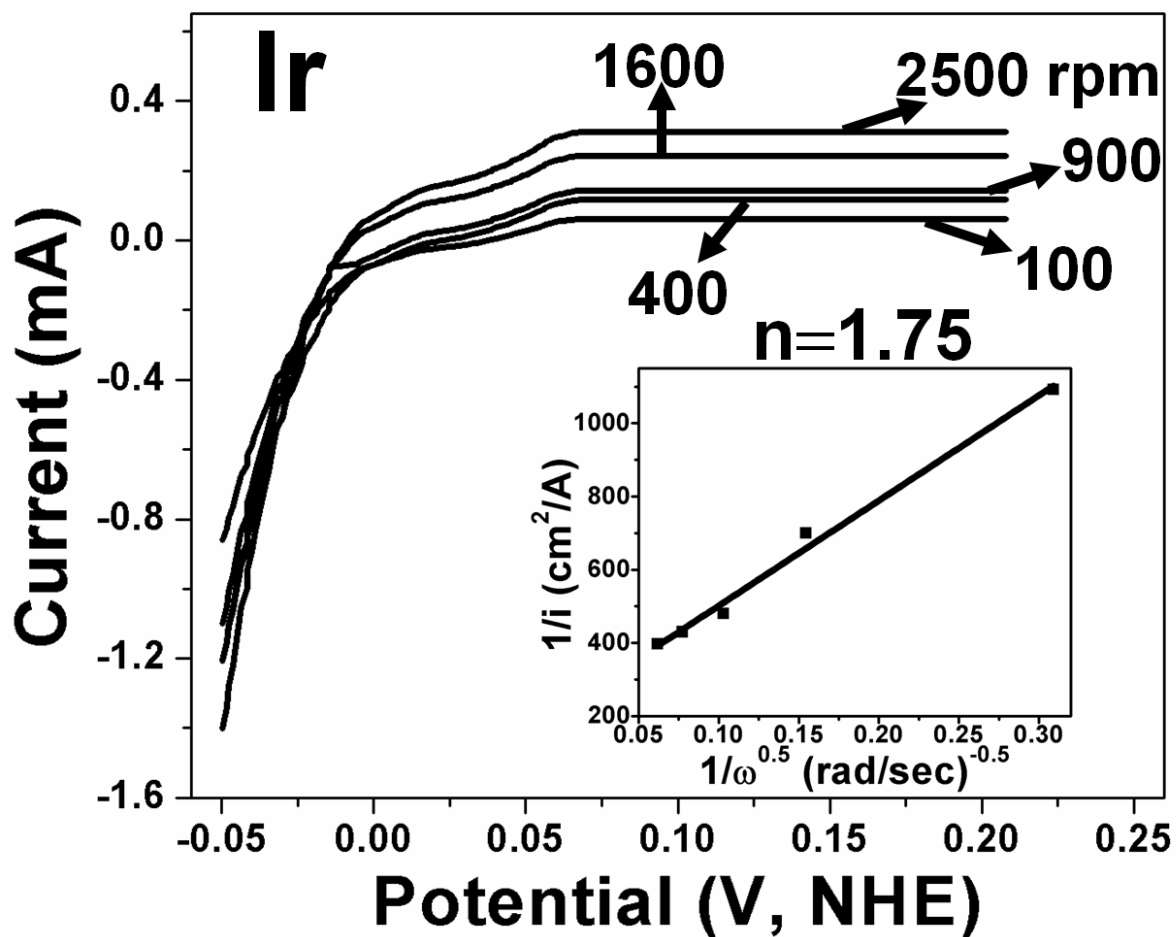

**Figure S16:** The polarization curve for HOR of Ir-NPs obtained on rotating disk electrode (RDE), measured in  $\text{H}_2$  saturated  $0.5 \text{ M H}_2\text{SO}_4$  electrolyte solution at  $40^\circ\text{C}$  with a scan rate of  $10 \text{ mV/sec}$ . Koutechy-Levich plot obtained for Ir is shown in the inset of the polarization curve.

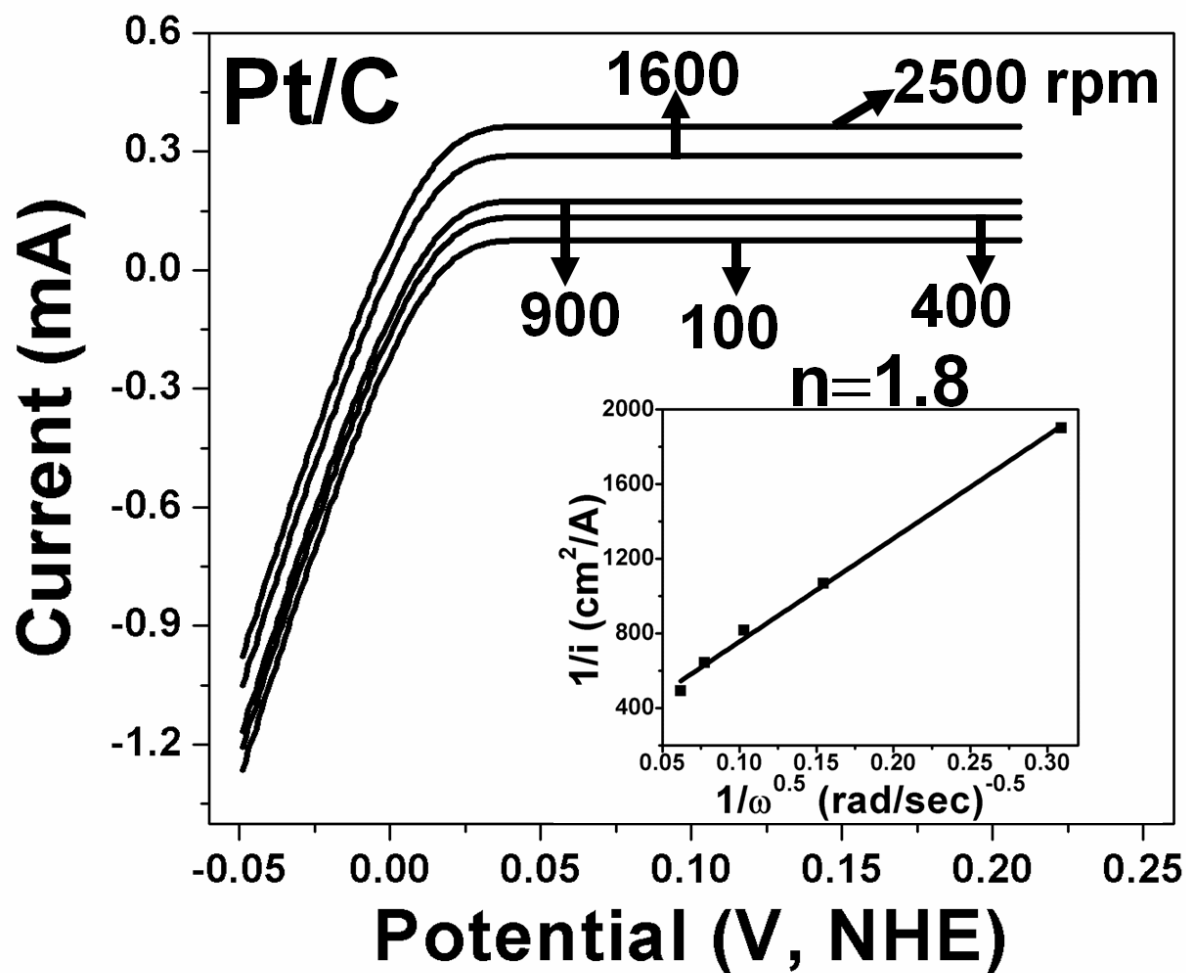

**Figure S17:** The polarization curve for HOR of Pt/C obtained on rotating disk electrode (RDE), measured in  $\text{H}_2$  saturated 0.5 M  $\text{H}_2\text{SO}_4$  electrolyte solution at  $40^\circ\text{C}$  with a scan rate of 10 mV/sec. Koutechy-Levich plot obtained for Pt/C is shown in the inset of the polarization curve.

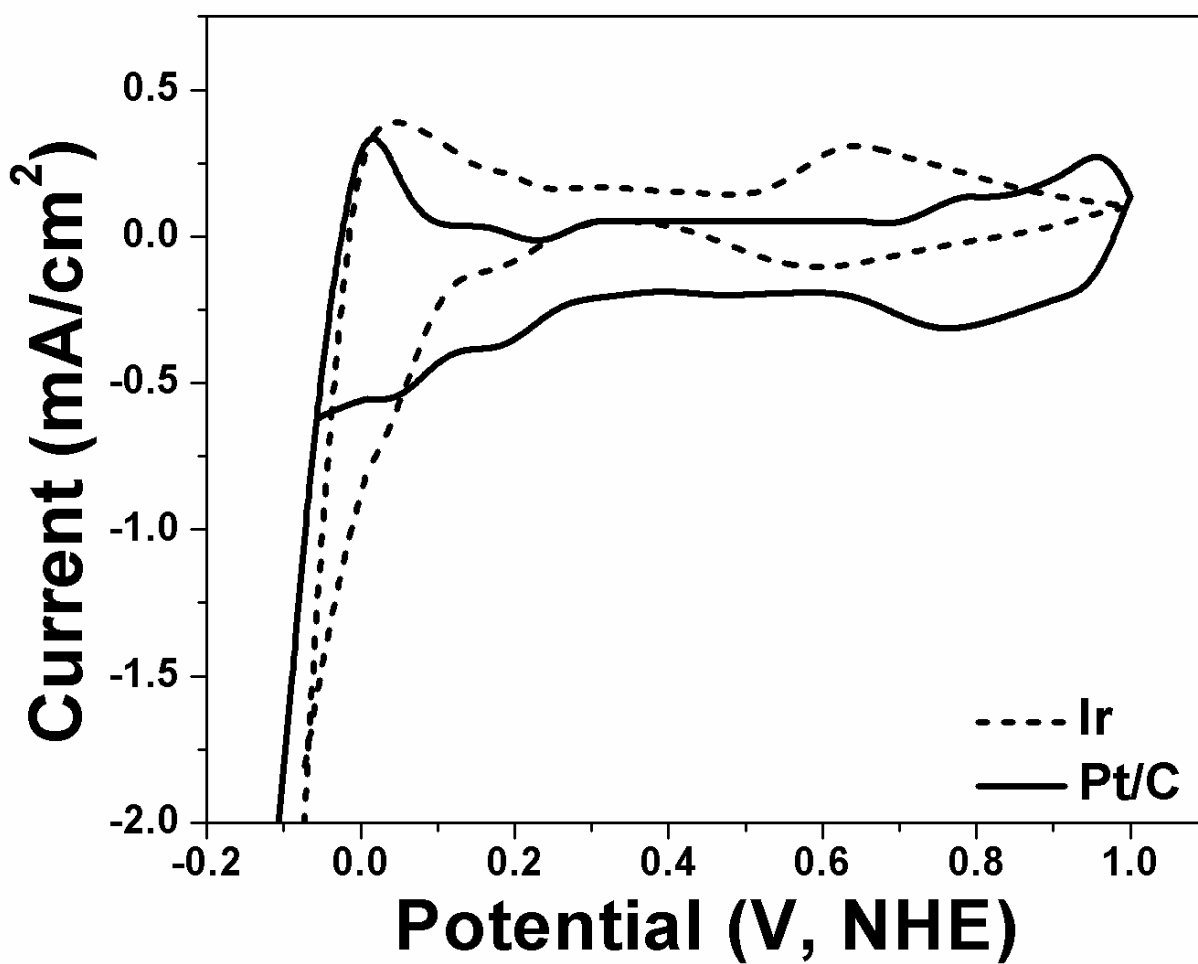

**Figure S18:** The cyclic voltammetry (CV) curve obtained for Ir-NPs and Pt/C, measured in N<sub>2</sub> saturated 0.5 M H<sub>2</sub>SO<sub>4</sub> electrolyte solution at 40°C collected at a scan rate of 10 mV/sec.

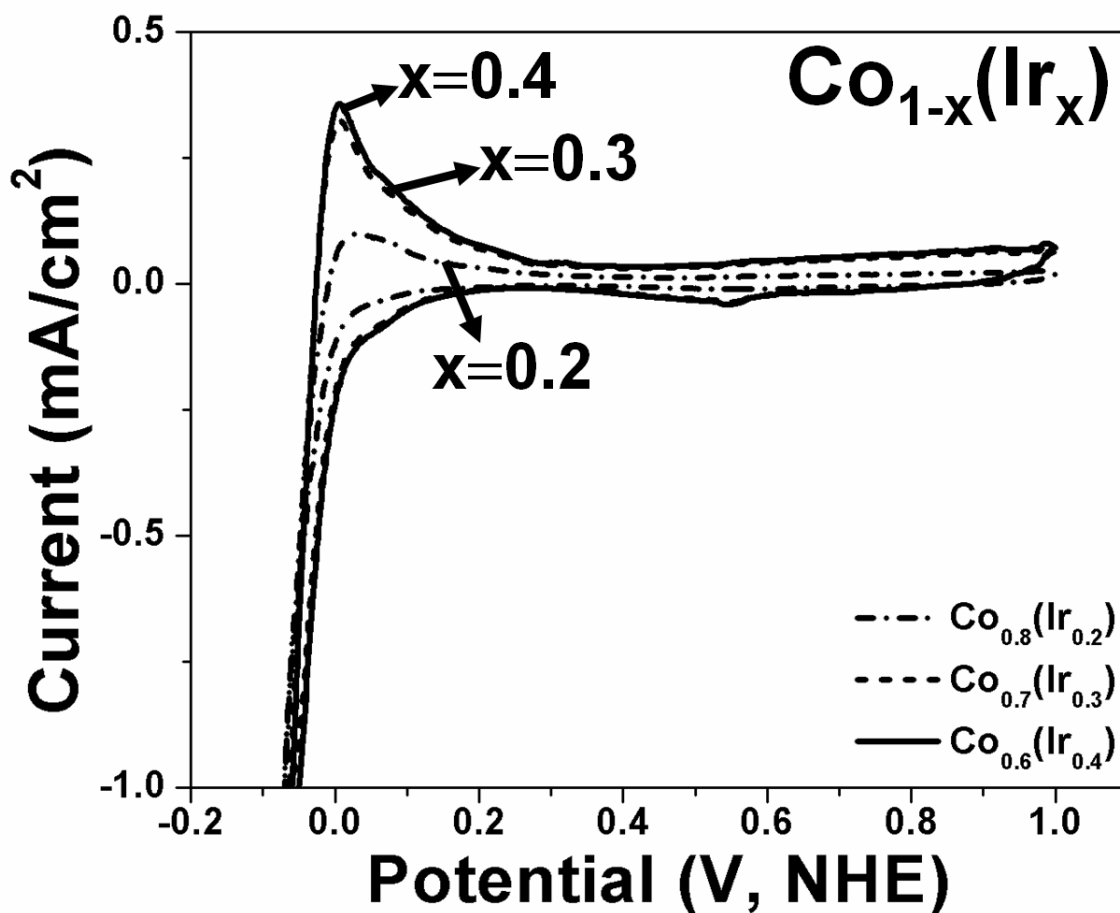

**Figure S19:** The cyclic voltammetry (CV) curve of Co<sub>1-x</sub>(Ir<sub>x</sub>) (x=0.2, 0.3, 0.4), measured in N<sub>2</sub> saturated 0.5 M H<sub>2</sub>SO<sub>4</sub> electrolyte solution at 40°C at scan rate of 10 mV/sec.
